# Supplementary material
Source: HighWire-hosted journal article supplement (https://erj.ersjournals.com/content/53/6/1801257)
Supplement: inline-supplementary-material-1 [file inline-supplementary-material-1.pdf]

## **SUPPLEMENTARY MATERIAL**

### **SUPPLEMENTARY TABLE S1. COMPOSITE OUTCOME AND COMPETING RISKS ANALYSIS.**

For this analysis, lung cancer and death were both coded as a composite outcome in the multivariable Cox regression model.

| <b>Composite Outcome Analysis</b>        | <b>HR</b> | <b>95% LL</b> | <b>95% UL</b> |
|------------------------------------------|-----------|---------------|---------------|
| ICS use (reference case)                 | 0.469     | 0.446         | 0.494         |
| Cumulative Years of Use                  | 0.843     | 0.82          | 0.867         |
| Cumulative Dose                          | 0.847     | 0.798         | 0.899         |
| Recency-Weighted Cumulative Dose         | 0.647     | 0.618         | 0.678         |
| Recency-Weighted Cumulative Years of Use | 0.590     | 0.531         | 0.656         |

In this analysis, lung cancer and death were modelled as competing risks in the multivariable Cox regression model.

| <b>Competing Risks Analysis</b>          | <b>HR</b> | <b>95% LL</b> | <b>95% UL</b> |
|------------------------------------------|-----------|---------------|---------------|
| ICS use (reference case)                 | 0.671     | 0.559         | 0.804         |
| Cumulative Years of Use                  | 0.874     | 0.806         | 0.948         |
| Cumulative Dose                          | 0.850     | 0.705         | 1.025         |
| Recency-Weighted Cumulative Dose         | 0.589     | 0.422         | 0.822         |
| Recency-Weighted Cumulative Years of Use | 0.730     | 0.641         | 0.831         |

## SUPPLEMENTARY TABLE S2. ALTERNATIVE COHORT SPECIFICATIONS.

In this analysis, different specifications of the cohort of COPD patients were used in the analysis to examine whether the primary results found in the manuscript would be robust across these different cohort specifications. All analyses use the reference case exposure definition: time-dependent ICS exposure. In the table below, the 'Primary COPD cohort' is the cohort use in the main multivariable analysis (presented in Table 4), reported here for the purposes of comparison.

In 'Cohort A', we only included those from the original cohort that had received a prescription, during the follow-up period, for an anticholinergic medication.

For 'Cohort B', any patient that had a physician encounter or a hospital discharge with ICD-9 code 493 was removed from the analysis.

| Cohort Specification             | HR    | 95% LL | 95% UL |
|----------------------------------|-------|--------|--------|
| Primary COPD cohort <sup>1</sup> | 0.698 | 0.606  | 0.803  |
| Cohort A <sup>2</sup>            | 0.680 | 0.583  | 0.792  |
| Cohort B <sup>3</sup>            | 0.693 | 0.595  | 0.808  |

<sup>1</sup> Cohort of COPD patients used in the primary analysis contained in the manuscript. <sup>2</sup> Cohort restricted to those that received a prescription for an anticholinergic medication. <sup>3</sup> Cohort restricted to those never having a physician encounter or hospital discharge associated with ICD-9 code 493 (asthma).
